# Supplementary material
Source: Springer Nature journal article supplement (https://www.springermedizin.de/resource/supplementary/13221_2011_20_MOESM1_ESM.pdf/9680784)

## Top

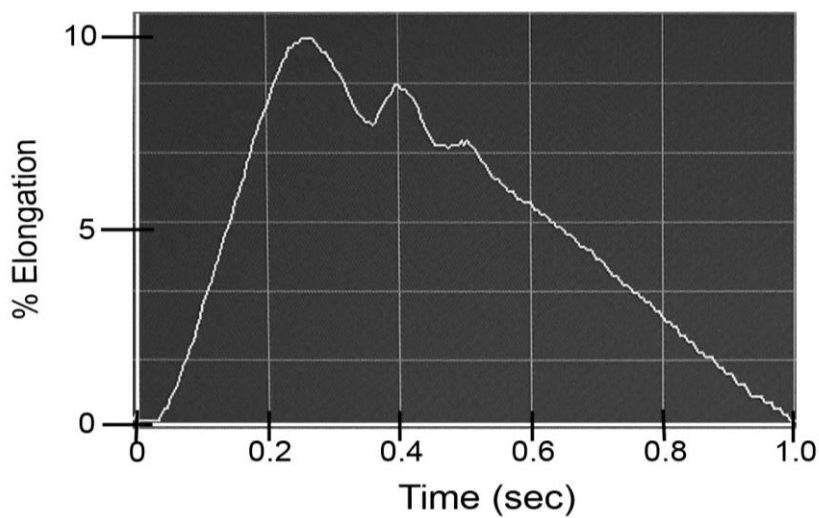

## Bottom

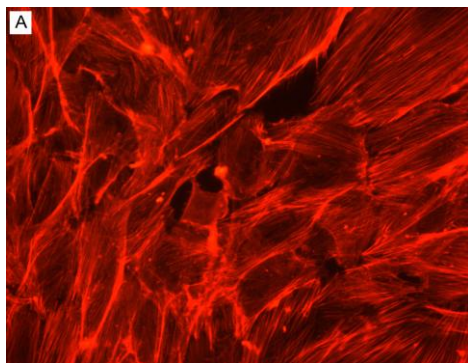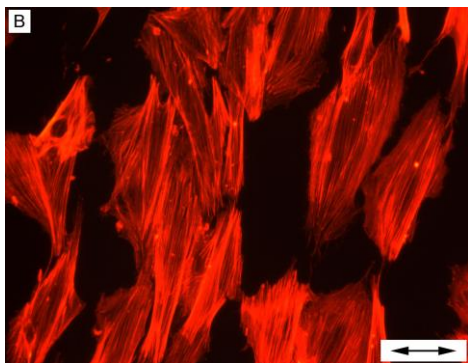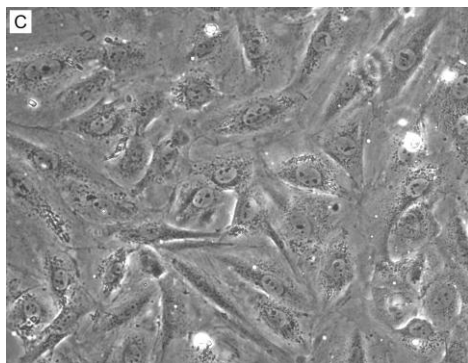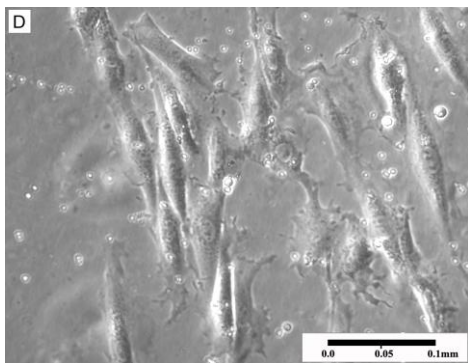

Supplement: MOESM1 [file 9680784]
